# Supplementary material
Source: PubMed Central journal article supplement (PMC8532356)

## ITFGGPSDSTGSNQNGER

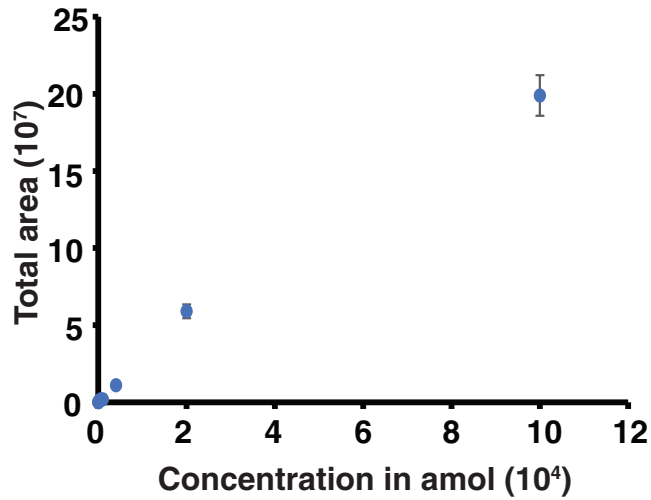

## DGIIWVATEGALNTPK

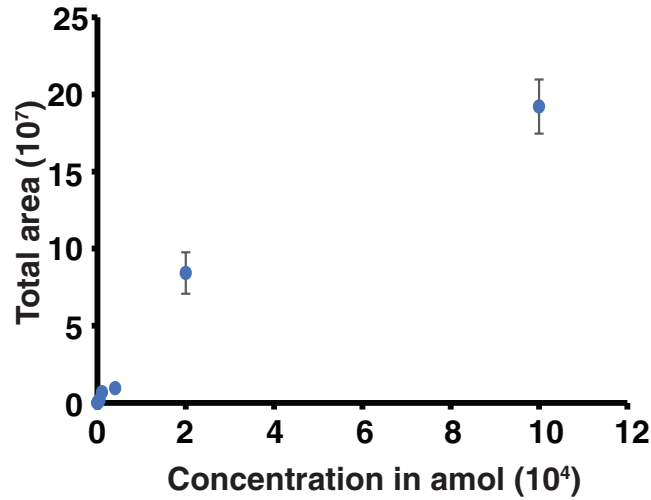

## NPANNAIIVLQLPQGTTLPK

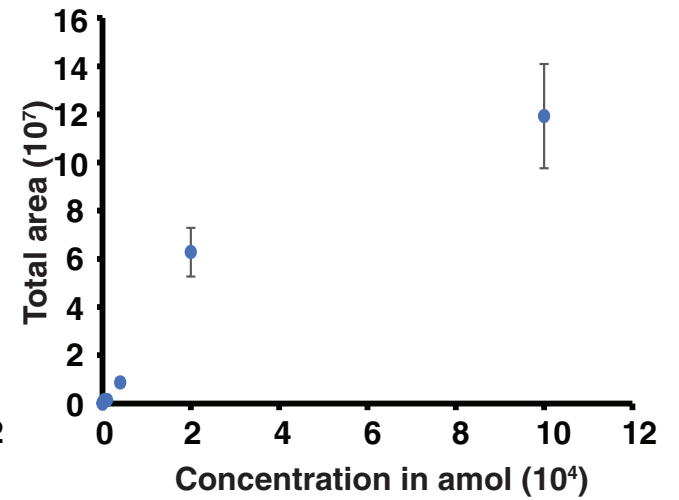

Supplement: 12014_2021_9331_MOESM1_ESM.pdf [file 12014_2021_9331_MOESM1_ESM.pdf]
